# Supplementary material for: Financial Impact of the Robotic Approach in Liver Surgery: A Comparative Study of Clinical Outcomes and Costs Between the Robotic and Open Technique in a Single Institution
Source: PubMed Central journal article supplement — J Laparoendosc Adv Surg Tech A. 2017 Apr 1;27(4):375–82. doi: 10.1089/lap.2016.0576 (PMC5397272; doi:10.1089/lap.2016.0576), 2017-04-01
Supplement: Supp_Table1.pdf [file Supp_Table1.pdf]

## Supplementary Data

SUPPLEMENTARY TABLE S1. DIRECT VARIABLE AND DIRECT FIXED COST ALLOCATION

| <i>Expense type</i> | <i>Expense category</i> | <i>Definition</i>                                                                                                                                                                                                                                      |
|---------------------|-------------------------|--------------------------------------------------------------------------------------------------------------------------------------------------------------------------------------------------------------------------------------------------------|
| Direct variable     | Labor                   | Salary and wage expenses that are directly associated with a specific procedure and vary with the change in volume.<br>Example: staff nurses wages.                                                                                                    |
|                     | Supplies                | Supply expenses that are directly associated with a specific procedure and vary with the change in volume.<br>Example: disposable supplies, drugs.                                                                                                     |
|                     | Other                   | Other direct expenses that are directly associated with a specific procedure and vary with the change in volume.<br>Example: laundry and linen.                                                                                                        |
| Direct fixed        | Labor                   | Salary and wage expenses that are directly associated with a department where procedures are performed, but do not vary with the change in volume.<br>Example: nurse manager salary.                                                                   |
|                     | Supplies                | Supply expenses that are directly associated with a department where procedures are performed, but do not vary with the change in volume.<br>Example: departmental office supplies and other expendable supplies.                                      |
|                     | Other                   | Other direct expenses that are directly associated with a department where procedures are performed, but do not vary with the change in volume.<br>Example: general service contracts for a department.                                                |
|                     | Capital                 | Depreciation expense for capital assets that are directly associated with a procedure (or procedures in the same department).                                                                                                                          |
| Indirect            | Medical education costs | Medical education expenses are allocated via a step down allocation process from the GME departments to the appropriate revenue department based on a calculation that uses the number of resident FTEs.                                               |
|                     | On behalf of expenses   | These expenses primarily comprised employee benefits, physician salary support, and utilities paid for by the university on behalf of the medical center. These expenses are also allocated via a step down allocation process to revenue departments. |
|                     | Other                   | All other overhead expenses (e.g., salaries, supplies, equipment, building) from support departments (e.g., administration, finance, HR, IS) are allocated to revenue departments based on a variety of allocation statistics.                         |

FTE, full-time equivalent; GME, graduate medical education.
